# Supplementary material
Source: Springer Nature journal article supplement (https://www.springermedizin.de/resource/supplementary/12950_2009_135_MOESM5_ESM.pdf/9558034)
Supplement: MOESM5 [file 9558034]

White cells: TNF $\alpha$  expression versus PTPH1-WT vehicle-treated 30 minutes post-challenge

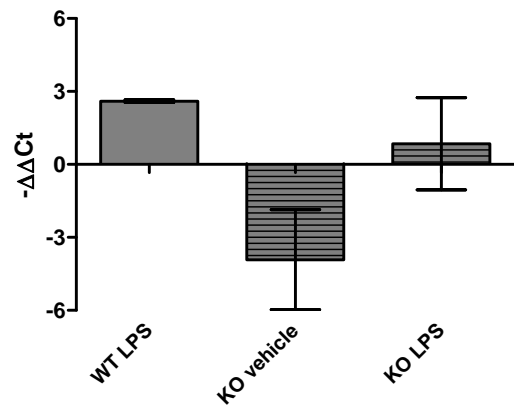

a

White cells: TNF $\alpha$  expression versus PTPH1-WT vehicle-treated 60 minutes post-challenge

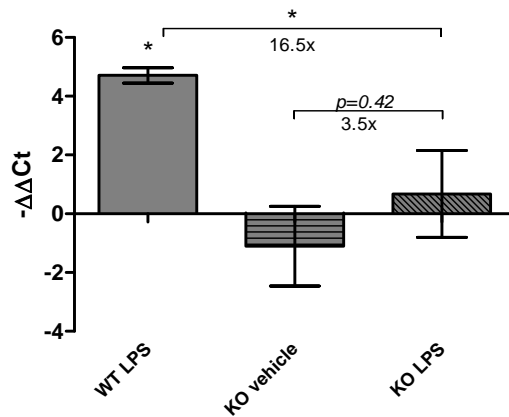

b

White cells: TNF $\alpha$  expression versus PTPH1-WT vehicle-treated 180 minutes post-challenge

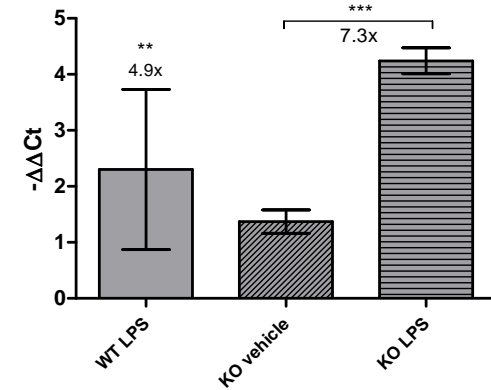

c

White cells: ccl2 expression versus PTPH1-WT vehicle-treated 60 minutes post-challenge

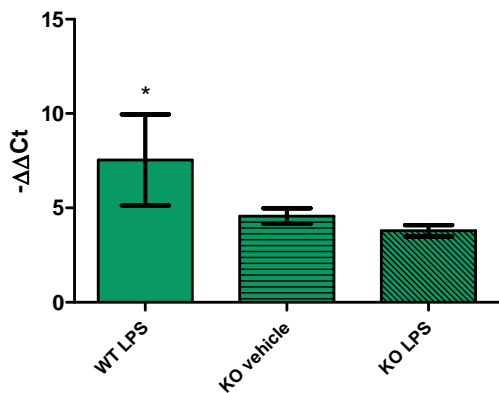

d

White cells: ccl2 expression versus PTPH1-WT vehicle-treated 180 minutes post-challenge

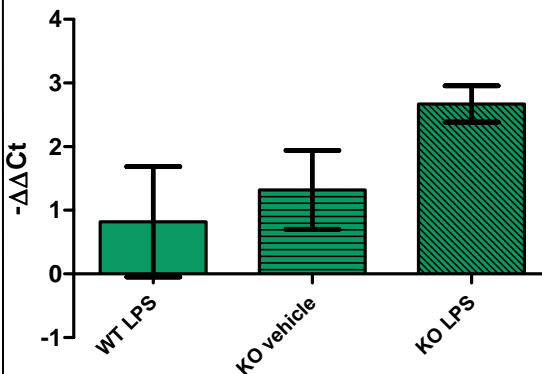

e
